# Supplementary material
Source: Springer Nature journal article supplement (https://www.springermedizin.de/resource/supplementary/12871_2014_332_MOESM3_ESM.pdf/9429124)

# ratio HMW / total adiponectin

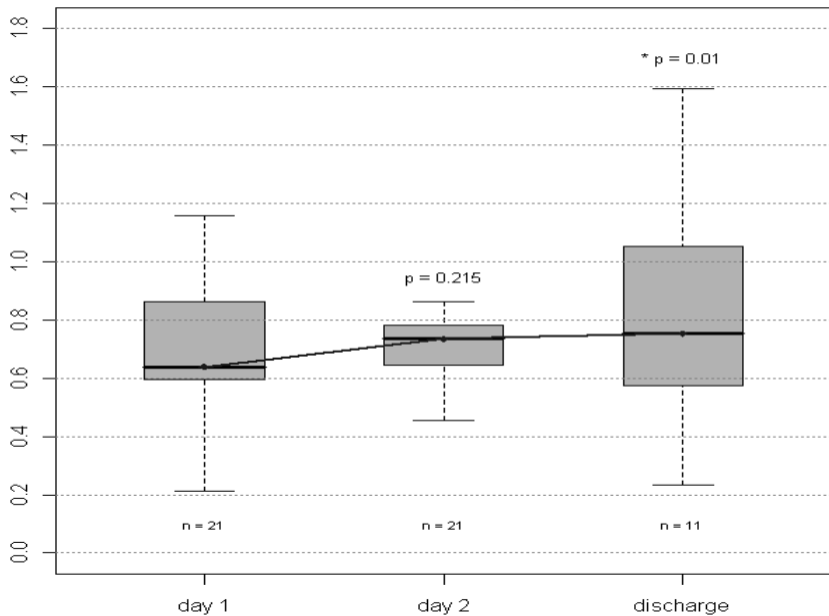

Supplement: MOESM3 [file 9429124]
